# Supplementary material
Source: PubMed Central journal article supplement (PMC4794368)
Supplement: NIHMS749181-supplement-Supplementary_Material.pdf [file NIHMS749181-supplement-Supplementary_Material.pdf]

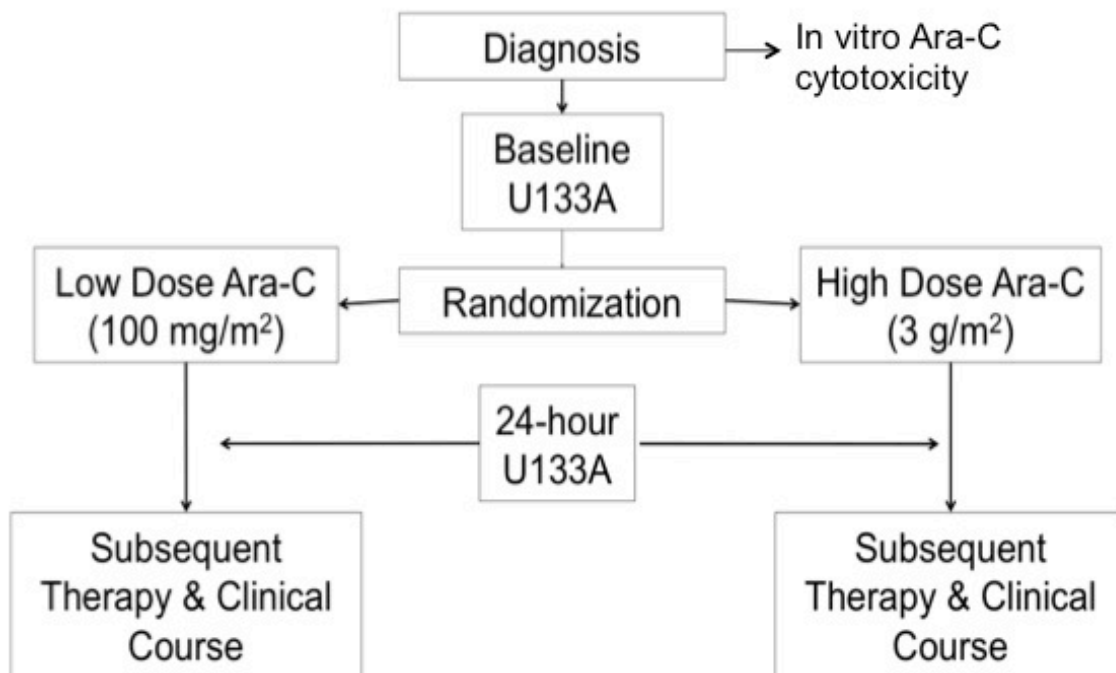

**Supplementary Figure 1S.** Schematic showing overall study design.

**Supplementary Table 1. List of genes with distinct pattern of expression differences between post-Ara\_C between LDAC and HDAC arms ( $p < 0.001$ ).**

| probeid     | Gene.Symbo | Gene Name                                                       | Stat    | perm.p | q value |
|-------------|------------|-----------------------------------------------------------------|---------|--------|---------|
| 220443_s_at | VAX2       | ventral anterior homeobox 2                                     | 3.3690  | 0.0006 | 1       |
| 210139_s_at | PMP22      | peripheral myelin protein 22                                    | 3.2498  | 0.0003 | 1       |
| 200730_s_at | PTP4A1     | protein tyrosine phosphatase type IVA, member 1                 | 3.1901  | 0.0008 | 1       |
| 201148_s_at | TIMP3      | TIMP metalloproteinase inhibitor 3                              | 3.0709  | 0.0009 | 1       |
| 203241_at   | UVRAG      | UV radiation resistance associated gene                         | -3.1901 | 0.0004 | 1       |
| 221376_at   | FGF17      | fibroblast growth factor 17                                     | -3.1901 | 0.0006 | 1       |
| 216698_x_at | OR7E47P    | olfactory receptor, family 7, subfamily E, member 47 pseudogene | -3.3094 | 0.0006 | 1       |
| 221378_at   | CER1       | cerberus 1, cysteine knot superfamily, homolog (Xenopus laevis) | -3.4883 | 0.0004 | 1       |

A positive z-statistic indicates that (arm A) had a greater median expression change than Arm B.

Supplementary Table 25. PROMISE analysis identified genes change in expression post ara-C to be predictive of beneficial or detrimental patterns of association with clinical endpoints in AML patients.

| A. PROMISE 3 (PR3) analysis utilizing 3 endpoints LC50, MRD22 and EFS |             |                                                                                               |           |            |          |              |              |               |             |                         |        |        |              |
|-----------------------------------------------------------------------|-------------|-----------------------------------------------------------------------------------------------|-----------|------------|----------|--------------|--------------|---------------|-------------|-------------------------|--------|--------|--------------|
| ProbeID                                                               | Gene.Symbol | Gene Name                                                                                     | LC50_stat | MRD22_stat | EFS_stat | PROMISE_stat | LC50 p value | MRD22 p value | EFS p value | PROMISE 3 (PR3) p value | BH95_q | PC06_q | Risk p value |
| 201088_at                                                             | KPNA2       | karyopherin alpha 2 (RAG cohort 1, importin alpha 1); karyopherin alpha-2 subunit II          | 0.708     | 0.568      | 0.290    | -0.522       | 0.044        | 0.006         | 0.136       | 0.000                   | 0.000  | 0.000  | 0.171        |
| 203699_s_at                                                           | DI02        | diiodolipase, diiodothyronine, type II                                                        | -0.708    | -0.468     | -0.506   | 0.561        | 0.040        | 0.026         | 0.009       | 0.000                   | 0.000  | 0.000  | 0.472        |
| 205547_s_at                                                           | TAGLN       | transgelin                                                                                    | -0.773    | -0.462     | -0.447   | 0.561        | 0.030        | 0.026         | 0.020       | 0.000                   | 0.000  | 0.000  | 0.652        |
| 205569_at                                                             | LAMP3       | lysosomal-associated membrane protein 3                                                       | -0.773    | -0.406     | -0.614   | 0.598        | 0.028        | 0.060         | 0.001       | 0.000                   | 0.000  | 0.000  | 0.686        |
| 206160_at                                                             | AP0BEC2     | apolipoprotein B mRNA editing enzyme, catalytic polypeptide-like 2                            | -0.602    | -0.531     | -0.493   | 0.542        | 0.110        | 0.010         | 0.010       | 0.000                   | 0.000  | 0.000  | 0.245        |
| 207366_at                                                             | KCN51       | potassium voltage-gated channel, delayed-rectifier, subfamily S, member 1                     | -0.773    | -0.365     | -0.448   | 0.529        | 0.024        | 0.085         | 0.020       | 0.000                   | 0.000  | 0.000  | 0.879        |
| 209668_x_at                                                           | CES2        | carboxylesterase 2 (intestine, liver)                                                         | -0.773    | -0.537     | -0.253   | 0.521        | 0.030        | 0.008         | 0.203       | 0.000                   | 0.000  | 0.000  | 0.658        |
| 210119_at                                                             | KCN115      | potassium inwardly-rectifying channel, subfamily J, member 15                                 | -0.773    | -0.586     | -0.331   | 0.564        | 0.027        | 0.004         | 0.090       | 0.000                   | 0.000  | 0.000  | 0.531        |
| 220849_at                                                             | FLJ22659    | hypothetical LOC100132472; hypothetical LOC79999; hypothetical LOC388436                      | -0.838    | -0.291     | -0.549   | 0.559        | 0.007        | 0.177         | 0.004       | 0.000                   | 0.000  | 0.000  | 0.719        |
| 221793_at                                                             | DOCK6       | dedicator of cytokinesis 6                                                                    | -0.708    | -0.400     | -0.650   | 0.586        | 0.043        | 0.064         | 0.000       | 0.000                   | 0.000  | 0.000  | 0.886        |
| 201053_s_at                                                           | PSMF1       | proteasome (prosome, macropain) inhibitor subunit 1 (Pi31)                                    | 0.773     | 0.403      | 0.306    | -0.494       | 0.027        | 0.057         | 0.116       | 0.000                   | 0.153  | 0.118  | 0.842        |
| 205444_at                                                             | ATP2A1      | ATPase, Ca++ transporting, cardiac muscle, fast twitch 1                                      | -0.773    | -0.523     | -0.349   | 0.548        | 0.029        | 0.011         | 0.071       | 0.000                   | 0.153  | 0.118  | 0.259        |
| 207780_at                                                             | CYLC2       | cylicin, basic protein of sperm head cytoskeleton 2                                           | -0.708    | -0.435     | -0.460   | 0.534        | 0.042        | 0.041         | 0.017       | 0.000                   | 0.153  | 0.118  | 0.858        |
| 212436_at                                                             | TRIM33      | tripartite motif-containing 33                                                                | -0.602    | -0.478     | -0.668   | 0.583        | 0.116        | 0.024         | 0.000       | 0.000                   | 0.153  | 0.118  | 0.983        |
| 216708_x_at                                                           | IGL2        | cytoskeleton associated protein 2                                                             | -0.643    | -0.520     | -0.411   | 0.525        | 0.096        | 0.013         | 0.033       | 0.000                   | 0.153  | 0.118  | 0.638        |
| 217330_at                                                             | DISC1       | disrupted in schizophrenia 1                                                                  | -0.643    | -0.307     | -0.607   | 0.519        | 0.097        | 0.152         | 0.001       | 0.000                   | 0.153  | 0.118  | 0.284        |
| 221999_at                                                             | VRK3        | vaccinia related kinase 3                                                                     | -0.838    | -0.504     | -0.233   | 0.525        | 0.008        | 0.017         | 0.246       | 0.000                   | 0.153  | 0.118  | 0.388        |
| 35447_at                                                              | ADRBK1      | adrenergic, beta, receptor kinase 1                                                           | -0.643    | -0.400     | -0.546   | 0.530        | 0.091        | 0.059         | 0.003       | 0.000                   | 0.153  | 0.118  | 0.809        |
| 208429_x_at                                                           | HNF4A       | hepatocyte nuclear factor 4, alpha                                                            | -0.659    | -0.277     | -0.549   | 0.495        | 0.066        | 0.200         | 0.004       | 0.000                   | 0.153  | 0.118  | 0.854        |
| 211920_at                                                             | CFB         | complement factor B                                                                           | -0.643    | -0.450     | -0.408   | 0.500        | 0.097        | 0.031         | 0.032       | 0.000                   | 0.217  | 0.192  | 0.943        |
| 214598_at                                                             | CLDN8       | claudin 8                                                                                     | -0.708    | -0.579     | -0.309   | 0.532        | 0.043        | 0.004         | 0.114       | 0.000                   | 0.217  | 0.192  | 0.435        |
| 217857_s_at                                                           | RBM8A       | RNA binding motif protein 8A                                                                  | 0.708     | 0.325      | 0.530    | -0.521       | 0.042        | 0.133         | 0.005       | 0.000                   | 0.217  | 0.192  | 0.476        |
| 202585_s_at                                                           | NFX1        | nuclear transcription factor, X-box binding 1                                                 | -0.773    | -0.326     | -0.427   | 0.509        | 0.027        | 0.132         | 0.028       | 0.000                   | 0.278  | 0.254  | 0.941        |
| 209966_x_at                                                           | ESRRG       | estrogen-related receptor gamma                                                               | -0.667    | -0.417     | -0.472   | 0.519        | 0.050        | 0.049         | 0.013       | 0.000                   | 0.278  | 0.254  | 0.355        |
| 213078_x_at                                                           | AGPAT7      | lysophosphatidylcholine acyltransferase 4                                                     | -0.838    | -0.291     | -0.372   | 0.500        | 0.008        | 0.172         | 0.052       | 0.000                   | 0.278  | 0.254  | 0.498        |
| 212265_at                                                             | QKI         | quaking homolog, KH domain RNA binding (mouse)                                                | 0.708     | 0.391      | 0.372    | -0.490       | 0.042        | 0.068         | 0.059       | 0.000                   | 0.312  | 0.273  | 0.779        |
| 212570_at                                                             | ENDOD1      | endonuclease domain containing 1                                                              | -0.449    | -0.541     | -0.512   | 0.501        | 0.251        | 0.010         | 0.006       | 0.000                   | 0.312  | 0.273  | 0.603        |
| 212885_at                                                             | MPHOSPH10   | M-phase phosphoprotein 10 (U3 small nucleolar ribonucleoprotein)                              | 0.838     | 0.493      | 0.126    | -0.486       | 0.009        | 0.019         | 0.518       | 0.000                   | 0.312  | 0.273  | 0.265        |
| 215114_at                                                             | SEN3        | SUMO1/sentrin/SMT3 specific peptidase 3                                                       | -0.708    | -0.391     | -0.409   | 0.503        | 0.043        | 0.067         | 0.035       | 0.000                   | 0.312  | 0.273  | 0.907        |
| 38398_at                                                              | MADD        | MAP-kinase activating death domain                                                            | -0.838    | -0.262     | -0.377   | 0.492        | 0.006        | 0.219         | 0.052       | 0.000                   | 0.312  | 0.273  | 0.546        |
| 45572_s_at                                                            | GGA1        | golgi associated, gamma adaptin ear containing, ARF binding protein 1                         | -0.773    | -0.334     | -0.339   | 0.482        | 0.028        | 0.120         | 0.083       | 0.000                   | 0.312  | 0.273  | 0.713        |
| 206242_at                                                             | TM4SF5      | transmembrane 4 L six family member 5                                                         | -0.513    | -0.488     | -0.493   | 0.498        | 0.185        | 0.021         | 0.010       | 0.001                   | 0.317  | 0.279  | 0.969        |
| 206841_at                                                             | POE6H       | phosphodiesterase 6H, cGMP-specific, cone, gamma                                              | -0.838    | -0.593     | -0.072   | 0.501        | 0.005        | 0.003         | 0.717       | 0.001                   | 0.317  | 0.279  | 0.094        |
| 208674_x_at                                                           | DOST        | dolichyl-diphosphooligosaccharide-protein glycosyltransferase                                 | 0.773     | 0.434      | 0.271    | -0.493       | 0.026        | 0.041         | 0.168       | 0.001                   | 0.317  | 0.279  | 0.810        |
| 209556_at                                                             | NCN         | neurochondrin                                                                                 | -0.773    | -0.444     | -0.301   | 0.506        | 0.024        | 0.035         | 0.127       | 0.001                   | 0.317  | 0.279  | 0.994        |
| 216294_s_at                                                           | KIAA1109    | KIAA1109                                                                                      | -0.838    | -0.428     | -0.256   | 0.508        | 0.007        | 0.044         | 0.190       | 0.001                   | 0.317  | 0.279  | 0.796        |
| 219041_s_at                                                           | REPIN1      | replication initiator 1                                                                       | 0.773     | 0.322      | 0.364    | -0.486       | 0.030        | 0.139         | 0.059       | 0.001                   | 0.317  | 0.279  | 0.599        |
| 219967_at                                                             | MRRM1       | mitochondrial rRNA methyltransferase 1 homolog (S. cerevisiae)                                | -0.384    | -0.714     | -0.434   | 0.511        | 0.333        | 0.000         | 0.022       | 0.001                   | 0.317  | 0.279  | 0.348        |
| 206421_s_at                                                           | SERPINB7    | serpin peptidase inhibitor, clade B (ovalbumin), member 7                                     | -0.513    | -0.505     | -0.446   | 0.488        | 0.185        | 0.015         | 0.020       | 0.001                   | 0.329  | 0.294  | 0.618        |
| 207239_s_at                                                           | PCTAIRE     | protein kinase 1                                                                              | -0.269    | -0.437     | -0.707   | 0.471        | 0.498        | 0.042         | 0.000       | 0.001                   | 0.329  | 0.294  | 0.560        |
| 209476_at                                                             | TXNDC       | thioredoxin-related transmembrane protein 1                                                   | 0.838     | 0.377      | 0.257    | -0.491       | 0.009        | 0.078         | 0.192       | 0.001                   | 0.329  | 0.294  | 0.910        |
| 211896_s_at                                                           | DCN         | decorin                                                                                       | -0.838    | -0.380     | -0.215   | 0.478        | 0.007        | 0.072         | 0.282       | 0.001                   | 0.329  | 0.294  | 0.367        |
| 213209_at                                                             | TA6L        | TA6L-like RNA polymerase II, p300/CBP-associated factor (PCAF)-associated factor, 6           | -0.773    | -0.161     | -0.520   | 0.485        | 0.029        | 0.463         | 0.007       | 0.001                   | 0.338  | 0.304  | 0.450        |
| 217830_s_at                                                           | NSFL1C      | NSFL1 (p97) cofactor (p47)                                                                    | -0.773    | -0.260     | -0.390   | 0.474        | 0.030        | 0.227         | 0.043       | 0.001                   | 0.338  | 0.304  | 0.483        |
| 219704_at                                                             | YBX2        | Y box binding protein 2                                                                       | -0.472    | -0.558     | -0.443   | 0.491        | 0.214        | 0.007         | 0.020       | 0.001                   | 0.338  | 0.304  | 0.763        |
| 220538_at                                                             | ADM2        | adrenomedullin 2                                                                              | -0.643    | -0.421     | -0.419   | 0.494        | 0.094        | 0.045         | 0.028       | 0.001                   | 0.338  | 0.304  | 0.692        |
| 221001_at                                                             | LOC647835   | chromosome 15 open reading frame 49                                                           | -0.594    | -0.503     | -0.337   | 0.478        | 0.126        | 0.017         | 0.086       | 0.001                   | 0.338  | 0.304  | 0.091        |
| 221047_s_at                                                           | MARX1       | MAP/microtubule affinity-regulating kinase 1                                                  | -0.594    | -0.465     | -0.338   | 0.499        | 0.126        | 0.029         | 0.024       | 0.001                   | 0.338  | 0.304  | 0.320        |
| 40189_at                                                              | SET         | SET nuclear oncogene; similar to SET translocation                                            | 0.773     | 0.514      | 0.156    | -0.481       | 0.027        | 0.015         | 0.436       | 0.001                   | 0.338  | 0.304  | 0.220        |
| 211147_s_at                                                           | P2RX11      | purinergic receptor P2X, ligand-gated ion channel, 6                                          | -0.773    | -0.336     | -0.285   | 0.465        | 0.027        | 0.115         | 0.147       | 0.001                   | 0.339  | 0.308  | 0.944        |
| 212168_at                                                             | RBM12       | RNA binding motif protein 12; copine 1                                                        | 0.838     | 0.338      | 0.223    | -0.467       | 0.007        | 0.117         | 0.257       | 0.001                   | 0.339  | 0.308  | 0.484        |
| 216443_at                                                             | LUZP2       | leucine zipper protein 2                                                                      | -0.602    | -0.626     | -0.235   | 0.488        | 0.120        | 0.001         | 0.236       | 0.001                   | 0.339  | 0.308  | 0.226        |
| 218476_at                                                             | POMT1       | protein-O-mannosyltransferase 1                                                               | -0.708    | -0.501     | -0.196   | 0.468        | 0.043        | 0.014         | 0.325       | 0.001                   | 0.339  | 0.308  | 0.439        |
| 49327_at                                                              | SIRT3       | sirtuin (silent mating type information regulation 2 homolog) 3 (S. cerevisiae)               | -0.708    | -0.530     | -0.246   | 0.495        | 0.042        | 0.011         | 0.214       | 0.001                   | 0.339  | 0.308  | 0.339        |
| 49878_at                                                              | PEX16       | peroxisomal biogenesis factor 16                                                              | -0.513    | -0.704     | -0.251   | 0.489        | 0.197        | 0.000         | 0.201       | 0.001                   | 0.339  | 0.308  | 0.459        |
| 202231_at                                                             | PCID1       | eukaryotic translation initiation factor 3, subunit M                                         | 0.773     | 0.457      | 0.179    | -0.470       | 0.029        | 0.030         | 0.367       | 0.001                   | 0.345  | 0.318  | 0.907        |
| 202621_at                                                             | IRF3        | interferon regulatory factor 3                                                                | -0.838    | -0.274     | -0.304   | 0.472        | 0.006        | 0.199         | 0.120       | 0.001                   | 0.345  | 0.318  | 0.743        |
| 216272_x_at                                                           | SYDE1       | synapse defective 1, Rho GTPase, homolog 1 (C. elegans)                                       | -0.838    | -0.301     | -0.298   | 0.479        | 0.006        | 0.163         | 0.132       | 0.001                   | 0.345  | 0.318  | 0.859        |
| 216540_at                                                             | TRA@        | T cell receptor alpha constant; T cell receptor alpha locus; T cell receptor alpha variant    | -0.602    | -0.292     | -0.547   | 0.480        | 0.115        | 0.177         | 0.004       | 0.001                   | 0.345  | 0.318  | 0.849        |
| 220977_x_at                                                           | EPB41L5     | erythrocyte membrane protein band 4.1 like 5                                                  | -0.773    | -0.247     | -0.417   | 0.479        | 0.027        | 0.259         | 0.030       | 0.001                   | 0.345  | 0.318  | 0.309        |
| 1494_f_at                                                             | CYP2A6      | cytochrome P450, family 2, subfamily A, polypeptide 6                                         | -0.838    | -0.165     | -0.432   | 0.478        | 0.007        | 0.459         | 0.025       | 0.001                   | 0.348  | 0.322  | 0.516        |
| 205981_s_at                                                           | ING2        | inhibitor of growth family, member 2                                                          | 0.773     | 0.400      | 0.229    | -0.467       | 0.028        | 0.057         | 0.245       | 0.001                   | 0.348  | 0.322  | 0.837        |
| 213664_at                                                             | SLC1A1      | solute carrier family 1 (neuronal/epithelial high affinity glutamate transporter, system Xc-) | -0.773    | -0.320     | -0.389   | 0.494        | 0.029        | 0.136         | 0.045       | 0.001                   | 0.348  | 0.322  | 0.342        |
| 215579_at                                                             | AP0BEC3G    | apolipoprotein B mRNA editing enzyme, catalytic polypeptide-like 3G                           | -0.342    | -0.681     | -0.381   | 0.468        | 0.384        | 0.000         | 0.050       | 0.001                   | 0.348  | 0.322  | 0.066        |
